# Supplementary material
Source: Springer Nature journal article supplement (https://www.springermedizin.de/resource/supplementary/12888_2011_930_MOESM3_ESM.pdf/9478556)

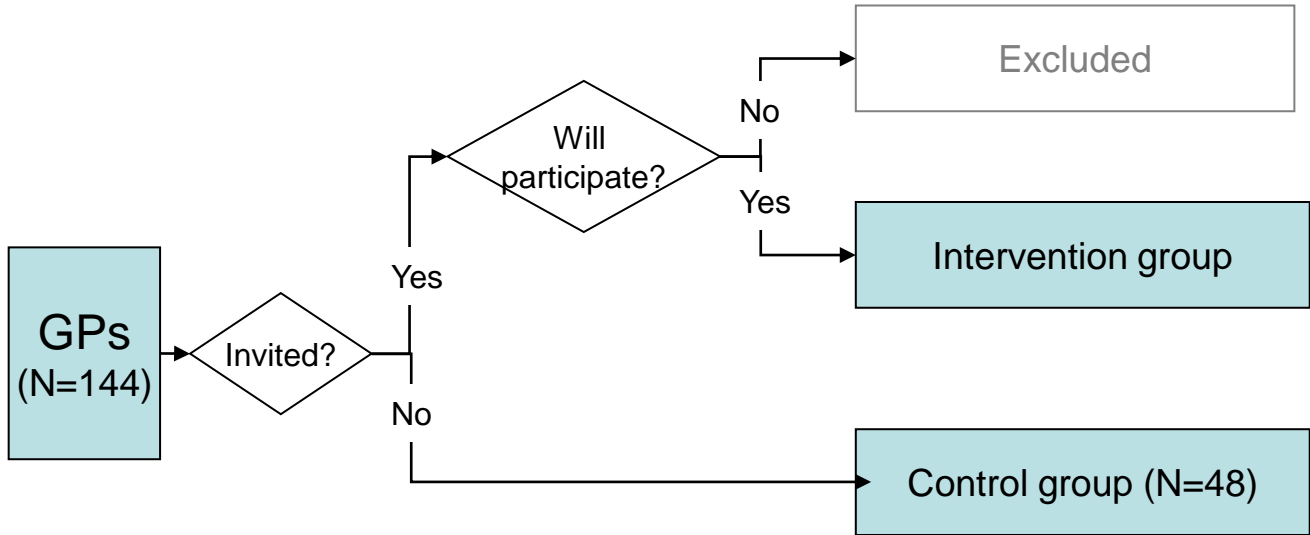

Supplement: MOESM3 [file 9478556]
